# Supplementary material for: Anion exchange in [Ni(η5-C5H4R)(Cl)(NHC)]. Counterion effect on the structure and catalytic activity
Source: Royal Society of Chemistry journal article supplement (doi:10.1039/c3dt53352b), 2014-01-01
Supplement: c3dt53352b1.pdf [file c3dt53352b1.pdf]

## Anion Exchange in $[\text{Ni}(\eta^5\text{-C}_5\text{H}_4\text{R})(\text{Cl})(\text{NHC})]$ . Counterion Effect on the Structure and Catalytic Activity

W. Buchowicz,<sup>1</sup> Ł. Banach, J. Conder, P. A. Guńka, D. Kubicki, and P. Buchalski  
Warsaw University of Technology, Faculty of Chemistry, Noakowskiego 3, 00-664 Warsaw, Poland

### Supporting Information

#### VT <sup>1</sup>H measurements of complex **3c**

In order to estimate the thermodynamic parameters of complex **3c** a series of variable-temperature <sup>1</sup>H NMR experiments was performed in the temperature range from -55 to 100 °C (Table S1). The function  $\delta=f(1/T)$  used to fit the experimental data has the following form:

$$\delta = \delta_{\text{ls}} + \frac{C}{T[1 + e^{(\Delta H^\circ - T\Delta S^\circ)/RT}]}$$

where  $\delta$  is the observed chemical shift,  $\delta_{\text{ls}}$  is the chemical shift fitted for diamagnetic species,  $\Delta H^\circ$  and  $\Delta S^\circ$  are the enthalpy and entropy, respectively, of the transition between low-spin and high-spin states,  $T$  is the absolute temperature in Kelvin, and  $C$  is a constant related to the molar susceptibility of the high-spin species. The experimental data and the fitting curve are shown in Figure S1.

Final set of parameters with asymptotic standard errors is as follows:

RMSD of residuals: 0.0226991

|                      |                     |           |
|----------------------|---------------------|-----------|
| $\delta_{\text{ls}}$ | $= 4.72 \pm 0.038$  | (0.81 %)  |
| $C$                  | $= 48000 \pm 30600$ | (63.51 %) |
| $\Delta H^\circ$     | $= 15151 \pm 430$   | (2.82 %)  |
| $\Delta S^\circ$     | $= 16.7 \pm 3.9$    | (23.14 %) |

**Table S1.** Set of parameters used for fitting chemical shifts in **3c**

| $t$ [°C] | $T$ [K] | $1/T$ [1/K] | Chemical shift of Cp [ppm] |
|----------|---------|-------------|----------------------------|
| -55      | 218.15  | 0.00458     | 4.30                       |
| -50      | 223.15  | 0.00448     | 4.26                       |
| -40      | 233.15  | 0.00429     | 4.10                       |
| -30      | 243.15  | 0.00411     | 3.90                       |
| -10      | 263.15  | 0.00380     | 3.39                       |
| 10       | 283.15  | 0.00353     | 2.70                       |
| 25       | 298.15  | 0.00335     | 2.00                       |
| 30       | 303.15  | 0.00330     | 1.74                       |
| 40       | 313.15  | 0.00319     | 1.22                       |
| 50       | 323.15  | 0.00309     | 0.64                       |
| 60       | 333.15  | 0.00300     | 0.00                       |
| 70       | 343.15  | 0.00291     | -0.68                      |
| 80       | 353.15  | 0.00283     | -1.42                      |
| 90       | 363.15  | 0.00275     | -2.20                      |
| 100      | 373.15  | 0.00268     | -3.00                      |

<sup>1</sup> Corresponding autor:

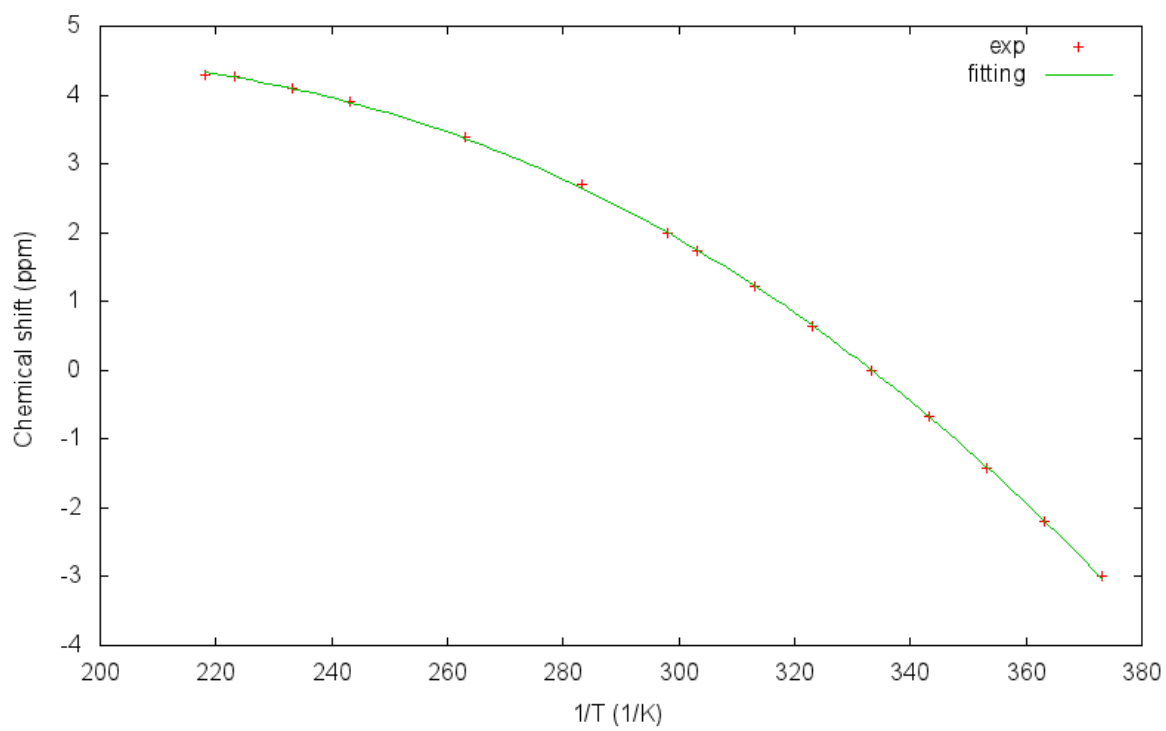

**Figure S1.** Experimental data and fitted curve for **3c**.

**Table S2.** Angles around nickel atoms and their sum in complexes **2c**, **3a**, **2j** and **3c**

| angle / °                    | <b>2c</b>  | <b>3a</b> | <b>2j</b>   | <b>3c</b>  |
|------------------------------|------------|-----------|-------------|------------|
| X(N3,O1)–Ni1–C6              | 102.23(8)  | 91.75(6)  | 94.61(7)    | 93.72(19)  |
| C6–Ni1–Cg                    | 132.57(6)  | 133.15(5) | 132.50(5)   | 133.60(14) |
| Cg–Ni1–X(N3,O1) <sup>a</sup> | 125.13(6)  | 135.03(4) | 132.85(6)   | 131.95(15) |
| $\Sigma$                     | 359.93(12) | 359.93(9) | 359.96(10)  | 359.3(3)   |
| <hr/>                        |            |           |             |            |
| N13–Ni2–C56                  | 102.83(8)  |           | O31–Ni2–C36 | 94.2(2)    |
| C56–Ni2–Cg                   | 131.09(6)  |           | C36–Ni2–Cg  | 133.81(19) |
| Cg–Ni1–N13                   | 126.05(6)  |           | Cg–Ni1–O31  | 131.31(15) |
| $\Sigma$                     | 359.97(12) |           |             | 359.3(3)   |

<sup>a</sup> N3 denotes the nitrogen atom of the coordinated acetonitrile for **2c** and **2j**; O1 denotes the oxygen atom of the trifluoroacetate or nitrate anions for complexes **3a** and **3c**, respectively. (See Figure 2 for the atom numbering scheme).

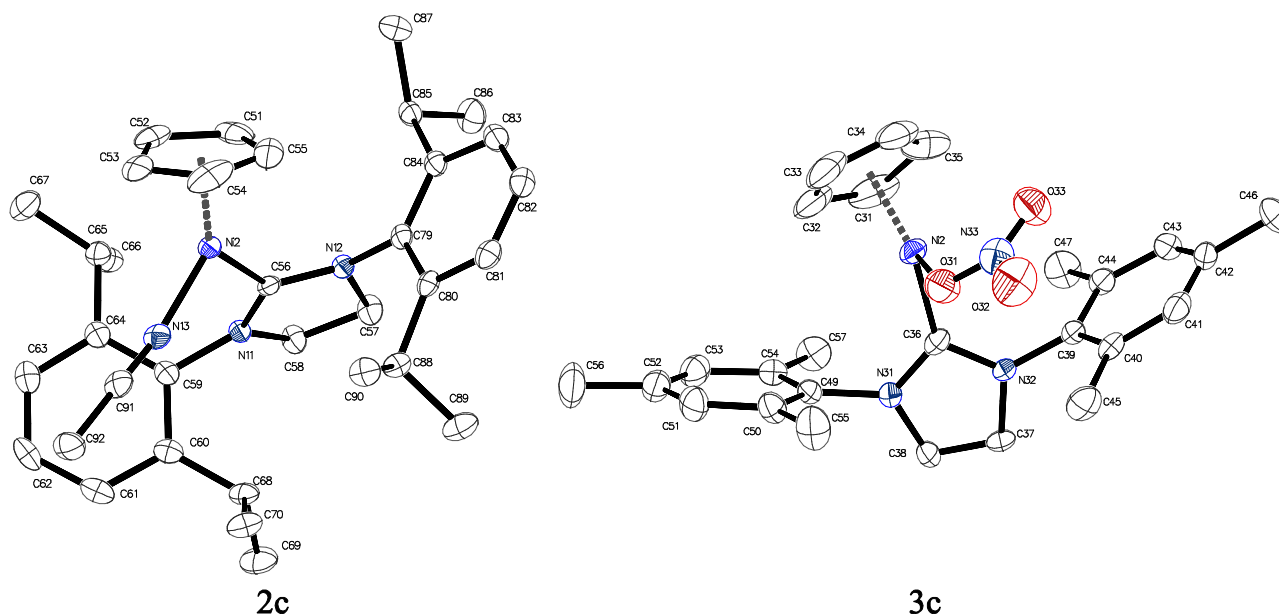

**Figure S3.** The molecular structure of complexes **2c** and **3c** (second molecules from the asymmetric unit). Hydrogen atoms are omitted for clarity. Thermal ellipsoids are drawn at 50% probability level.

**Table S3.** Selected bond lengths involving nickel in complexes **2c** and **3c** (the second molecules from the asymmetric unit)

---

| <i>d</i> /Å | <b>2c</b>  | <i>d</i> /Å | <b>3c</b> |
|-------------|------------|-------------|-----------|
| Ni2–C51     | 2.023(2)   | Ni2–C31     | 2.033(8)  |
| Ni2–C52     | 2.135(2)   | Ni2–C32     | 2.150(7)  |
| Ni2–C53     | 2.125(2)   | Ni2–C33     | 2.178(7)  |
| Ni2–C54     | 2.149(3)   | Ni2–C34     | 2.136(7)  |
| Ni2–C55     | 2.123(3)   | Ni2–C35     | 2.133(7)  |
| Ni2–C56     | 1.907(2)   | Ni2–C36     | 1.893(6)  |
| Ni2–N13     | 1.8719(18) | Ni2–O31     | 1.905(4)  |

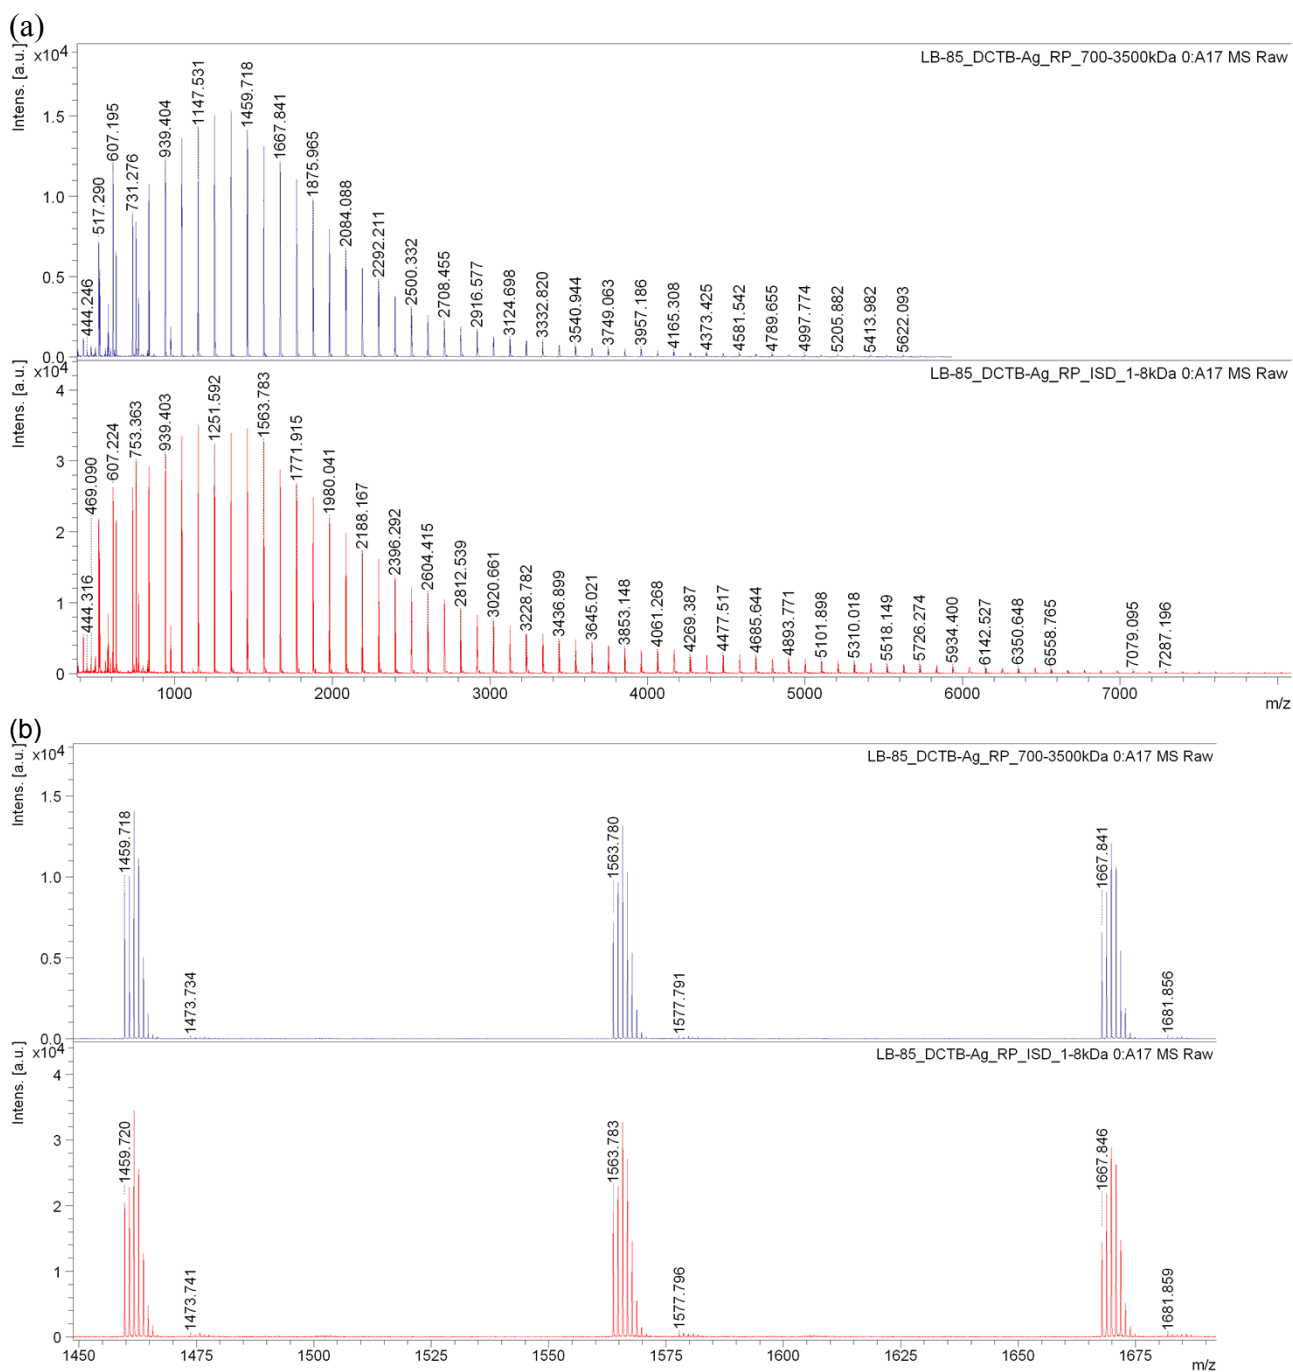

Bruker Daltonics flexAnalysis printed: 14-Oct-13 13:11:41

**Figure S3.** MALDI-TOF MS of polystyrene obtained with complex **2f** (DCTB matrix with added CF<sub>3</sub>COOAg): (a) full spectrum; (b) expanded.
